# Supplementary material
Source: Springer Nature journal article supplement (https://www.springermedizin.de/resource/supplementary/12884_2009_308_MOESM3_ESM.pdf/9457426)

**(a) Fitted 4-component model for white general**

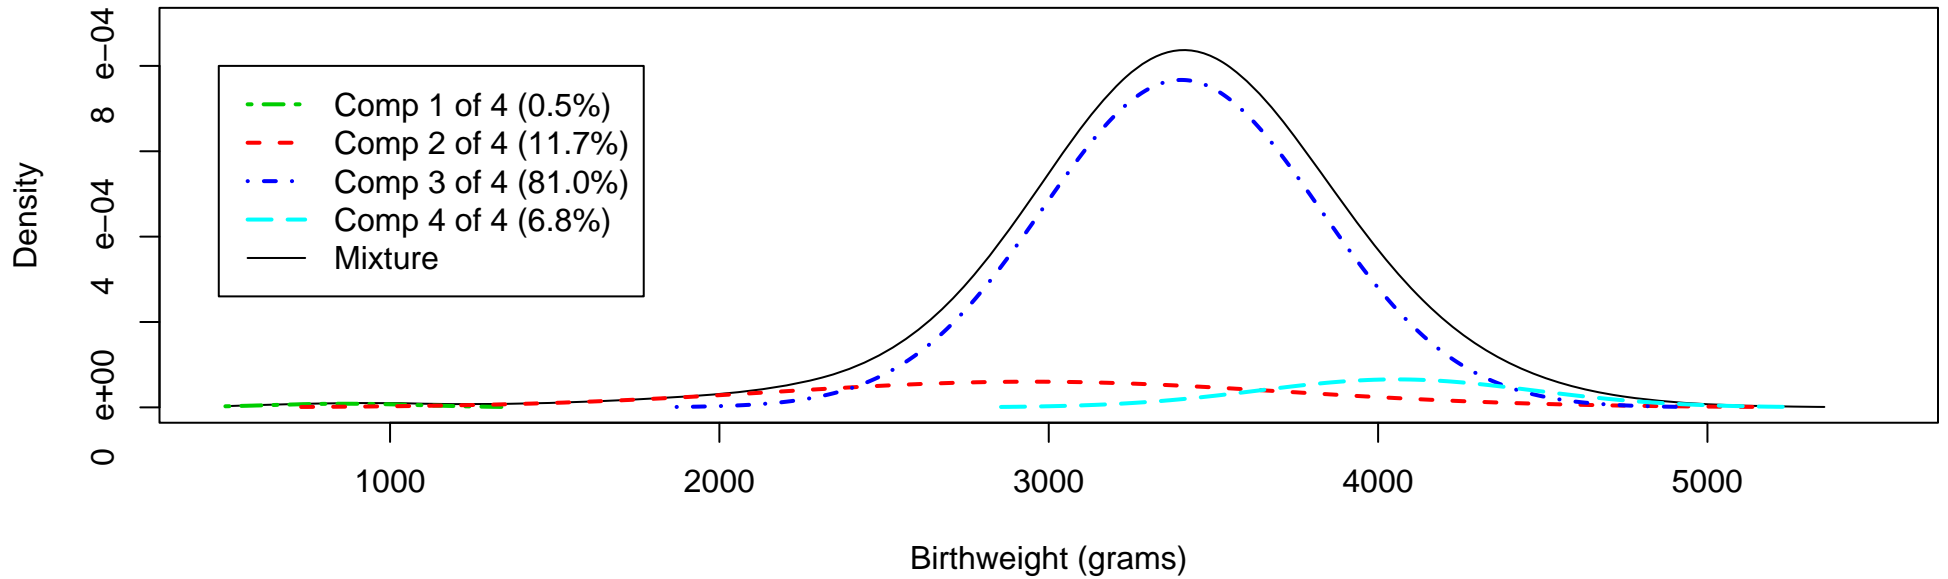

**(b) Estimated mortality for white general**

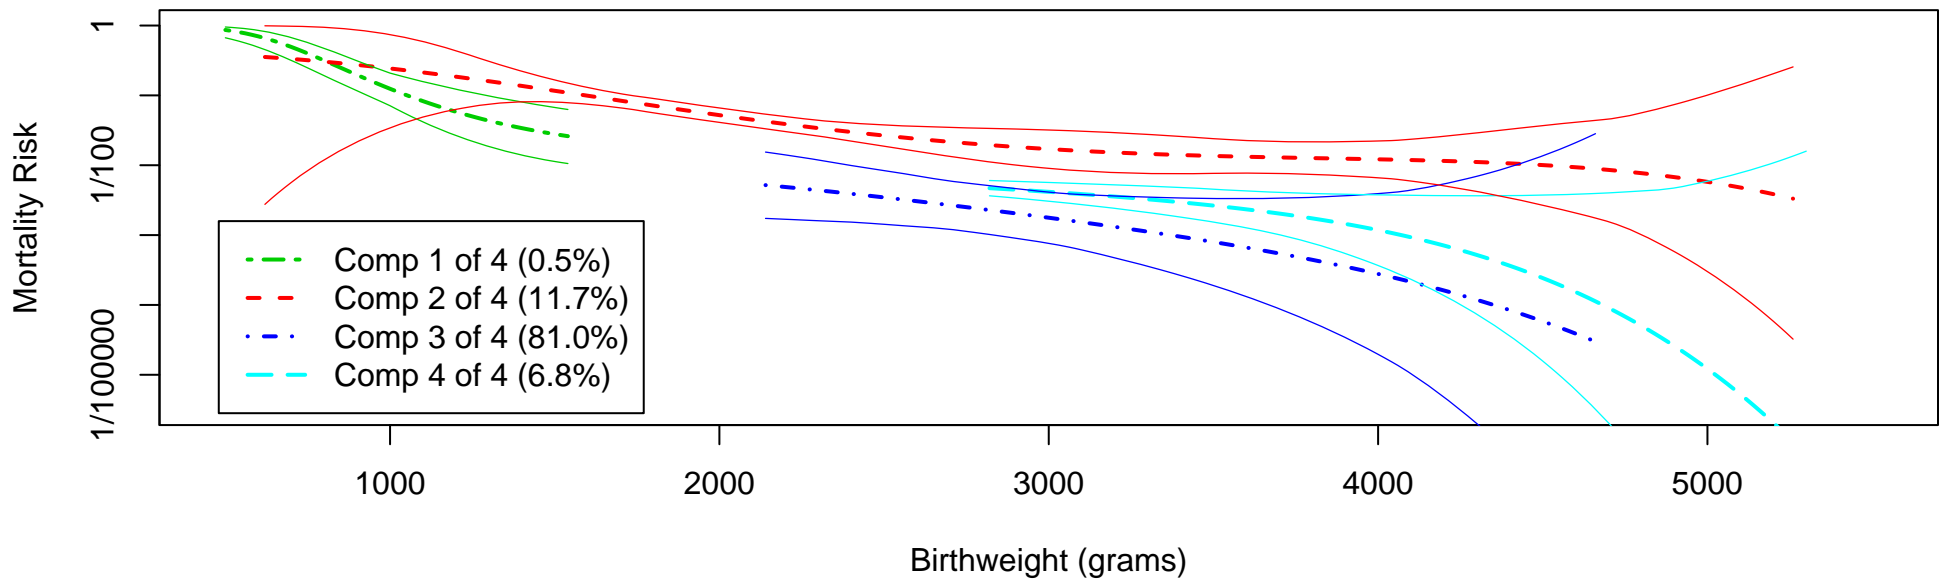

Supplement: MOESM3 [file 9457426]
